# Supplementary material for: Comparative Chloroplast Genomics and Maternal Lineage Diversity in Oil Palm (Elaeis guineensis)
Source: Research Square preprint supplement (doi:10.21203/rs.3.rs-8662850/v1), 2026-02-23
Supplement: Supplementary file 1 [file 1f2a0cef9e29a283b3c7f00d.docx]

Supplementary Table S2. All SSR in the Chloroplast Genome of oil palm

| No | **Accessions** |  | **Dura BBG** | **Dura CMR** | **Pisifera Tz** | **Dura Tz** |
| --- | --- | --- | --- | --- | --- | --- |
| 1 | **Mononucleotide Repeat** | A | 152 | 151 | 151 | 151 |
|  |  | C | 14 | 14 | 14 | 14 |
|  |  | G | 8 | 8 | 8 | 8 |
|  |  | T | 165 | 165 | 166 | 165 |
|  |  | Total | 339 | 338 | 339 | 338 |
|  |  | A/T | 317 | 316 | 317 | 316 |
|  |  | G/C | 22 | 22 | 22 | 22 |
| 2 | **Dinucleotide Repeat** | AG | 4 | 4 | 4 | 4 |
|  |  | AT | 25 | 25 | 25 | 25 |
|  |  | CA | 1 | 1 | 1 | 1 |
|  |  | CT | 2 | 2 | 2 | 2 |
|  |  | GA | 5 | 5 | 5 | 5 |
|  |  | GT | 2 | 2 | 2 | 2 |
|  |  | TA | 11 | 11 | 11 | 11 |
|  |  | TC | 7 | 7 | 7 | 7 |
|  |  | TG | 1 | 1 | 1 | 1 |
|  |  | Total | 58 | 58 | 58 | 58 |
|  |  | AT/TA | 36 | 36 | 36 | 36 |
| 3 | **Trinucleotide** | ATA | 4 | 4 | 4 | 4 |
|  |  | ATC | 1 | 1 | 1 | 1 |
|  |  | ATG | 1 | 1 | 1 | 1 |
|  |  | ATT | 4 | 4 | 4 | 4 |
|  |  | AAC | 5 | 5 | 5 | 5 |
|  |  | AAG | 6 | 6 | 6 | 6 |
|  |  | AAT | 4 | 4 | 4 | 4 |
|  |  | CAA | 1 | 1 | 1 | 1 |
|  |  | CAG | 1 | 1 | 1 | 1 |
|  |  | CTG | 1 | 1 | 1 | 1 |
|  |  | CTT | 5 | 5 | 5 | 5 |
|  |  | ACC | 1 | 1 | 1 | 1 |
|  |  | AGA | 3 | 3 | 3 | 3 |
|  |  | AGC | 1 | 1 | 1 | 1 |
|  |  | AGG | 1 | 1 | 1 | 1 |
|  |  | GAA | 3 | 3 | 3 | 3 |
|  |  | GAG | 1 | 1 | 1 | 1 |
|  |  | GCA | 1 | 1 | 1 | 1 |
|  |  | GGT | 1 | 1 | 1 | 1 |
|  |  | GTT | 2 | 2 | 2 | 2 |
|  |  | TAA | 2 | 2 | 2 | 2 |
|  |  | TAT | 8 | 8 | 8 | 8 |
|  |  | TCA | 2 | 2 | 2 | 2 |
|  |  | TCT | 3 | 3 | 3 | 3 |
|  |  | TGA | 2 | 2 | 2 | 2 |
|  |  | TGC | 1 | 1 | 1 | 1 |
|  |  | TGG | 1 | 1 | 1 | 1 |
|  |  | TTA | 1 | 1 | 1 | 1 |
|  |  | TTC | 6 | 6 | 6 | 6 |
|  |  | TTG | 2 | 2 | 2 | 2 |
|  |  | Total | 75 | 75 | 75 | 75 |
| 4 | **Tetranucleotide** | AAAC | 2 | 2 | 2 | 2 |
|  |  | AAAG | 3 | 3 | 3 | 3 |
|  |  | AAAT | 5 | 5 | 5 | 5 |
|  |  | AACA | 3 | 3 | 3 | 3 |
|  |  | AACT | 1 | 1 | 1 | 1 |
|  |  | AAGA | 2 | 2 | 2 | 2 |
|  |  | AAGG | 1 | 1 | 1 | 1 |
|  |  | AAGT | 1 | 1 | 1 | 1 |
|  |  | AATA | 6 | 6 | 6 | 6 |
|  |  | AATC | 3 | 3 | 3 | 3 |
|  |  | AATG | 2 | 2 | 2 | 2 |
|  |  | AGAA | 1 | 1 | 1 | 1 |
|  |  | AGGG | 1 | 1 | 1 | 1 |
|  |  | ATAA | 2 | 2 | 2 | 2 |
|  |  | ATAC | 2 | 2 | 2 | 2 |
|  |  | ATAG | 2 | 2 | 2 | 2 |
|  |  | ATCT | 2 | 2 | 2 | 2 |
|  |  | ATGA | 1 | 1 | 1 | 1 |
|  |  | ATGG | 1 | 1 | 1 | 1 |
|  |  | ATGT | 1 | 1 | 1 | 1 |
|  |  | ATTA | 5 | 5 | 5 | 5 |
|  |  | CAAT | 2 | 2 | 2 | 2 |
|  |  | CTTC | 1 | 1 | 1 | 1 |
|  |  | GAAA | 1 | 1 | 1 | 1 |
|  |  | GATA | 1 | 1 | 1 | 1 |
|  |  | GATT | 2 | 2 | 2 | 2 |
|  |  | GCCT | 1 | 1 | 1 | 1 |
|  |  | GGCA | 1 | 1 | 1 | 1 |
|  |  | GTTG | 1 | 1 | 1 | 1 |
|  |  | TACG | 1 | 1 | 1 | 1 |
|  |  | TACT | 1 | 1 | 1 | 1 |
|  |  | TAGA | 1 | 1 | 1 | 1 |
|  |  | TATC | 2 | 2 | 2 | 2 |
|  |  | TATT | 3 | 3 | 3 | 3 |
|  |  | TCAT | 1 | 1 | 1 | 1 |
|  |  | TCTA | 3 | 3 | 3 | 3 |
|  |  | TCTT | 2 | 2 | 2 | 2 |
|  |  | TGAC | 1 | 1 | 1 | 1 |
|  |  | TGTT | 1 | 1 | 1 | 1 |
|  |  | TTAA | 1 | 1 | 1 | 1 |
|  |  | TTAG | 1 | 1 | 1 | 1 |
|  |  | TTAT | 3 | 3 | 3 | 3 |
|  |  | TTCA | 1 | 1 | 1 | 1 |
|  |  | TTCC | 1 | 1 | 1 | 1 |
|  |  | TTCT | 5 | 5 | 5 | 5 |
|  |  | TTGC | 1 | 1 | 1 | 1 |
|  |  | TTGG | 2 | 2 | 2 | 2 |
|  |  | TTTA | 5 | 5 | 5 | 5 |
|  |  | TTTC | 2 | 2 | 2 | 2 |
|  |  | TTTG | 1 | 1 | 1 | 1 |
|  |  | Total | 96 | 96 | 96 | 96 |
| 5 | **Pentanucleotide** | AAAAG | 1 | 1 | 1 | 1 |
|  |  | AAACT | 1 | 1 | 1 | 1 |
|  |  | AAAGA | 1 | 1 | 1 | 1 |
|  |  | AAATA | 1 | 1 | 1 | 1 |
|  |  | AACCA | 1 | 1 | 1 | 1 |
|  |  | AACTA | 1 | 1 | 1 | 1 |
|  |  | AAGAA | 1 | 1 | 1 | 1 |
|  |  | AAGGA | 2 | 2 | 2 | 2 |
|  |  | AAGTA | 1 | 1 | 1 | 1 |
|  |  | AATAA | 3 | 3 | 3 | 3 |
|  |  | AATAG | 1 | 1 | 1 | 1 |
|  |  | AATAT | 2 | 2 | 2 | 2 |
|  |  | AATCC | 1 | 1 | 1 | 1 |
|  |  | AATCG | 1 | 1 | 1 | 1 |
|  |  | AATGA | 1 | 1 | 1 | 1 |
|  |  | AATGG | 1 | 1 | 1 | 1 |
|  |  | ACAAA | 1 | 1 | 1 | 1 |
|  |  | ACATG | 1 | 1 | 1 | 1 |
|  |  | ACCAA | 1 | 1 | 1 | 1 |
|  |  | ACCCG | 1 | 1 | 1 | 1 |
|  |  | ACCCT | 1 | 1 | 1 | 1 |
|  |  | ACCGA | 1 | 1 | 1 | 1 |
|  |  | ACGAA | 1 | 1 | 1 | 1 |
|  |  | ACGTG | 1 | 1 | 1 | 1 |
|  |  | ACTAA | 1 | 1 | 1 | 1 |
|  |  | ACTTC | 1 | 1 | 1 | 1 |
|  |  | AGAAA | 1 | 1 | 1 | 1 |
|  |  | AGGAA | 2 | 2 | 2 | 2 |
|  |  | ATAAA | 1 | 1 | 1 | 1 |
|  |  | ATACA | 1 | 1 | 1 | 1 |
|  |  | ATAGA | 2 | 2 | 2 | 2 |
|  |  | ATATT | 1 | 1 | 1 | 1 |
|  |  | ATCAA | 2 | 2 | 2 | 2 |
|  |  | ATCTG | 1 | 1 | 1 | 1 |
|  |  | ATGAA | 1 | 1 | 1 | 1 |
|  |  | ATGTA | 1 | 1 | 1 | 1 |
|  |  | ATGTG | 1 | 1 | 1 | 1 |
|  |  | ATTAA | 1 | 1 | 1 | 1 |
|  |  | ATTAG | 1 | 1 | 1 | 1 |
|  |  | ATTAT | 1 | 1 | 1 | 1 |
|  |  | ATTCA | 1 | 1 | 1 | 1 |
|  |  | ATTCG | 1 | 1 | 1 | 1 |
|  |  | ATTTC | 1 | 1 | 1 | 1 |
|  |  | ATTTT | 1 | 1 | 1 | 1 |
|  |  | CAAAG | 1 | 1 | 1 | 1 |
|  |  | CAACT | 1 | 1 | 1 | 1 |
|  |  | CATTG | 1 | 1 | 1 | 1 |
|  |  | CATTT | 1 | 1 | 1 | 1 |
|  |  | CCATT | 1 | 1 | 1 | 1 |
|  |  | CGAAA | 1 | 1 | 1 | 1 |
|  |  | CGAAC | 1 | 1 | 1 | 1 |
|  |  | CGAAT | 1 | 1 | 1 | 1 |
|  |  | CGATC | 1 | 1 | 1 | 1 |
|  |  | CGGAT | 1 | 1 | 1 | 1 |
|  |  | CTTTT | 1 | 1 | 1 | 1 |
|  |  | GAAAA | 2 | 2 | 2 | 2 |
|  |  | GAAAT | 1 | 1 | 1 | 1 |
|  |  | GAATG | 1 | 1 | 1 | 1 |
|  |  | GATCC | 1 | 1 | 1 | 1 |
|  |  | GATTC | 1 | 1 | 1 | 1 |
|  |  | GCAAT | 1 | 1 | 1 | 1 |
|  |  | GGAAC | 1 | 1 | 1 | 1 |
|  |  | GGATC | 1 | 1 | 1 | 1 |
|  |  | GGCCA | 1 | 1 | 1 | 1 |
|  |  | GTAAA | 1 | 1 | 1 | 1 |
|  |  | GTGAA | 1 | 1 | 1 | 1 |
|  |  | TAACA | 1 | 1 | 1 | 1 |
|  |  | TAAGA | 1 | 1 | 1 | 1 |
|  |  | TAATA | 2 | 1 | 1 | 1 |
|  |  | TAATT | 2 | 2 | 2 | 2 |
|  |  | TACAT | 1 | 1 | 1 | 1 |
|  |  | TACTT | 2 | 2 | 2 | 2 |
|  |  | TAGAA | 2 | 2 | 2 | 2 |
|  |  | TAGAG | 1 | 1 | 1 | 1 |
|  |  | TAGAT | 1 | 1 | 1 | 1 |
|  |  | TATAA | 1 | 1 | 1 | 1 |
|  |  | TATAT | 1 | 1 | 1 | 1 |
|  |  | TATCA | 1 | 1 | 1 | 1 |
|  |  | TATTA | 1 | 1 | 1 | 1 |
|  |  | TATTT | 2 | 2 | 2 | 2 |
|  |  | TCAAT | 1 | 1 | 1 | 1 |
|  |  | TCAGA | 1 | 1 | 1 | 1 |
|  |  | TCCAA | 1 | 1 | 1 | 1 |
|  |  | TCGGG | 1 | 1 | 1 | 1 |
|  |  | TCTAT | 1 | 1 | 1 | 1 |
|  |  | TCTCT | 1 | 1 | 1 | 1 |
|  |  | TCTTC | 1 | 1 | 1 | 1 |
|  |  | TCTTT | 1 | 1 | 1 | 1 |
|  |  | TGAAA | 1 | 1 | 1 | 1 |
|  |  | TGAAT | 1 | 1 | 1 | 1 |
|  |  | TGGAT | 2 | 2 | 2 | 2 |
|  |  | TGTAA | 1 | 1 | 1 | 1 |
|  |  | TTACT | 2 | 2 | 2 | 2 |
|  |  | TTATT | 1 | 1 | 1 | 1 |
|  |  | TTCCT | 2 | 2 | 2 | 2 |
|  |  | TTCTA | 5 | 5 | 5 | 5 |
|  |  | TTGAC | 1 | 1 | 1 | 1 |
|  |  | TTGAT | 1 | 1 | 1 | 1 |
|  |  | TTGGA | 1 | 1 | 1 | 1 |
|  |  | TTGTT | 1 | 1 | 1 | 1 |
|  |  | TTTCA | 1 | 1 | 1 | 1 |
|  |  | TTTGA | 1 | 1 | 1 | 1 |
|  |  | TTTGC | 1 | 1 | 1 | 1 |
|  |  | TTTGT | 1 | 2 | 2 | 2 |
|  |  | TTTTA | 5 | 5 | 5 | 5 |
|  |  | TTTTC | 3 | 3 | 3 | 3 |
|  |  | TTTTG | 2 | 2 | 2 | 2 |
|  |  | Total | 134 | 134 | 134 | 134 |
| 6 | **Hexanucleotide** | AAAAAG | 1 | 1 | 1 | 1 |
|  |  | AAAAAT | 1 | 2 | 2 | 2 |
|  |  | AAAGAA | 2 | 2 | 2 | 2 |
|  |  | AAAGAT | 1 | 1 | 1 | 1 |
|  |  | AAAGTA | 1 | 1 | 1 | 1 |
|  |  | AAAGTG | 1 | 1 | 1 | 1 |
|  |  | AAATGA | 1 | 1 | 1 | 1 |
|  |  | AAATTC | 1 | 1 | 1 | 1 |
|  |  | AACAAA | 1 | 1 | 1 | 1 |
|  |  | AACAAT | 1 | 1 | 1 | 1 |
|  |  | AACATA | 1 | 1 | 1 | 1 |
|  |  | AAGAAA | 1 | 1 | 1 | 1 |
|  |  | AAGCAT | 1 | 1 | 1 | 1 |
|  |  | AATAAA | 1 | 1 | 1 | 1 |
|  |  | AATAGC | 1 | 1 | 1 | 1 |
|  |  | AATATA | 1 | 1 | 1 | 1 |
|  |  | AATATC | 1 | 1 | 1 | 1 |
|  |  | AATTAG | 1 | 1 | 1 | 1 |
|  |  | AATTCG | 1 | 1 | 1 | 1 |
|  |  | AATTGA | 1 | 1 | 1 | 1 |
|  |  | AATTTA | 1 | 1 | 1 | 1 |
|  |  | ACATAA | 1 | 1 | 1 | 1 |
|  |  | ACGGGC | 1 | 1 | 1 | 1 |
|  |  | ACTAAA | 1 | 1 | 1 | 1 |
|  |  | ACTAAT | 1 | 1 | 1 | 1 |
|  |  | ACTATT | 1 | 1 | 1 | 1 |
|  |  | ACTTTT | 1 | 1 | 1 | 1 |
|  |  | AGAAAT | 1 | 1 | 1 | 1 |
|  |  | AGAAGG | 1 | 1 | 1 | 1 |
|  |  | AGAGGA | 1 | 1 | 1 | 1 |
|  |  | AGAGTC | 1 | 1 | 1 | 1 |
|  |  | AGATCC | 1 | 1 | 1 | 1 |
|  |  | AGGAAA | 1 | 1 | 1 | 1 |
|  |  | AGGAAG | 1 | 1 | 1 | 1 |
|  |  | AGTCCC | 1 | 1 | 1 | 1 |
|  |  | AGTTTG | 1 | 1 | 1 | 1 |
|  |  | ATAAGT | 1 | 1 | 1 | 1 |
|  |  | ATAGAA | 2 | 2 | 2 | 2 |
|  |  | ATAGGA | 1 | 1 | 1 | 1 |
|  |  | ATATAC | 1 | 1 | 1 | 1 |
|  |  | ATATCG | 2 | 2 | 2 | 2 |
|  |  | ATCTTA | 1 | 1 | 1 | 1 |
|  |  | ATGCCT | 1 | 1 | 1 | 1 |
|  |  | ATGTAT | 1 | 1 | 1 | 1 |
|  |  | ATTACT | 1 | 1 | 1 | 1 |
|  |  | ATTCCA | 1 | 1 | 1 | 1 |
|  |  | ATTCGA | 1 | 1 | 1 | 1 |
|  |  | ATTTAG | 1 | 1 | 1 | 1 |
|  |  | ATTTTC | 1 | 1 | 1 | 1 |
|  |  | CACTTT | 1 | 1 | 1 | 1 |
|  |  | CATATG | 1 | 1 | 1 | 1 |
|  |  | CATTCC | 1 | 1 | 1 | 1 |
|  |  | CATTTC | 1 | 1 | 1 | 1 |
|  |  | CCCGAG | 1 | 1 | 1 | 1 |
|  |  | CGATAT | 2 | 2 | 2 | 2 |
|  |  | CGCTTC | 1 | 1 | 1 | 1 |
|  |  | CTAATT | 1 | 1 | 1 | 1 |
|  |  | CTATCC | 1 | 1 | 1 | 1 |
|  |  | CTATTA | 1 | 1 | 1 | 1 |
|  |  | CTCAAG | 1 | 1 | 1 | 1 |
|  |  | CTCAAT | 2 | 1 | 1 | 1 |
|  |  | CTCGGA | 1 | 1 | 1 | 1 |
|  |  | CTTAAT | 1 | 1 | 1 | 1 |
|  |  | CTTATT | 1 | 1 | 1 | 1 |
|  |  | CTTTAG | 1 | 1 | 1 | 1 |
|  |  | CTTTTT | 2 | 2 | 2 | 2 |
|  |  | GAAATG | 1 | 1 | 1 | 1 |
|  |  | GAAATT | 1 | 1 | 1 | 1 |
|  |  | GAAGCG | 1 | 1 | 1 | 1 |
|  |  | GAATAG | 1 | 1 | 1 | 1 |
|  |  | GAATTA | 1 | 1 | 1 | 1 |
|  |  | GAATTG | 1 | 1 | 1 | 1 |
|  |  | GACACT | 1 | 1 | 1 | 1 |
|  |  | GACTCT | 1 | 1 | 1 | 1 |
|  |  | GCTGAA | 1 | 1 | 1 | 1 |
|  |  | GCTTCA | 1 | 1 | 1 | 1 |
|  |  | GCTTTG | 1 | 1 | 1 | 1 |
|  |  | GGGATA | 1 | 1 | 1 | 1 |
|  |  | GTAATA | 1 | 1 | 1 | 1 |
|  |  | GTATAT | 1 | 1 | 1 | 1 |
|  |  | GTATTA | 1 | 1 | 1 | 1 |
|  |  | GTATTT | 1 | 1 | 1 | 1 |
|  |  | GTCAGA | 1 | 1 | 1 | 1 |
|  |  | GTTCTA | 1 | 1 | 1 | 1 |
|  |  | GTTTTT | 1 | 1 | 1 | 1 |
|  |  | TAAAGC | 1 | 1 | 1 | 1 |
|  |  | TAAGAA | 1 | 1 | 1 | 1 |
|  |  | TAAGAT | 1 | 1 | 1 | 1 |
|  |  | TAAGTC | 1 | 1 | 1 | 1 |
|  |  | TAATAG | 1 | 1 | 1 | 1 |
|  |  | TACAAC | 1 | 1 | 1 | 1 |
|  |  | TACCAA | 1 | 1 | 1 | 1 |
|  |  | TAGAAT | 1 | 1 | 1 | 1 |
|  |  | TAGATA | 1 | 1 | 1 | 1 |
|  |  | TAGTAA | 1 | 1 | 1 | 1 |
|  |  | TATAAT | 2 | 2 | 2 | 2 |
|  |  | TATATC | 1 | 1 | 1 | 1 |
|  |  | TATCGT | 1 | 1 | 1 | 1 |
|  |  | TATGGA | 1 | 1 | 1 | 1 |
|  |  | TATGGT | 1 | 1 | 1 | 1 |
|  |  | TATGTA | 1 | 1 | 1 | 1 |
|  |  | TATTAA | 1 | 1 | 1 | 1 |
|  |  | TATTAC | 2 | 2 | 2 | 2 |
|  |  | TATTAG | 1 | 1 | 1 | 1 |
|  |  | TATTAT | 1 | 1 | 1 | 1 |
|  |  | TATTCA | 1 | 1 | 1 | 1 |
|  |  | TATTGG | 1 | 1 | 1 | 1 |
|  |  | TATTTG | 1 | 1 | 1 | 1 |
|  |  | TCAGTG | 1 | 1 | 1 | 1 |
|  |  | TCCCCA | 1 | 1 | 1 | 1 |
|  |  | TCCGAG | 1 | 1 | 1 | 1 |
|  |  | TCCTAA | 1 | 1 | 1 | 1 |
|  |  | TCGAAT | 1 | 1 | 1 | 1 |
|  |  | TCGTAA | 1 | 1 | 1 | 1 |
|  |  | TCTTTC | 1 | 1 | 1 | 1 |
|  |  | TCTTTT | 1 | 1 | 1 | 1 |
|  |  | TGAAGT | 1 | 1 | 1 | 1 |
|  |  | TGAATG | 1 | 1 | 1 | 1 |
|  |  | TGATAT | 1 | 1 | 1 | 1 |
|  |  | TGATCA | 1 | 1 | 1 | 1 |
|  |  | TGCAGC | 1 | 2 | 2 | 2 |
|  |  | TGGTTT | 1 | 1 | 1 | 1 |
|  |  | TGTATA | 2 | 1 | 1 | 1 |
|  |  | TGTCTT | 1 | 1 | 1 | 1 |
|  |  | TTAAAA | 1 | 1 | 1 | 1 |
|  |  | TTATA | 1 | 1 | 1 | 1 |
|  |  | TTAGGA | 1 | 1 | 1 | 1 |
|  |  | TTATCA | 1 | 1 | 1 | 1 |
|  |  | TTCATA | 1 | 1 | 1 | 1 |
|  |  | TTCATT | 1 | 2 | 2 | 2 |
|  |  | TTCCAT | 1 | 1 | 1 | 1 |
|  |  | TTCCTC | 1 | 1 | 1 | 1 |
|  |  | TTCGAA | 1 | 1 | 1 | 1 |
|  |  | TTCTTA | 2 | 2 | 2 | 2 |
|  |  | TTGAAA | 1 | 1 | 1 | 1 |
|  |  | TTGATC | 1 | 1 | 1 | 1 |
|  |  | TTGGAA | 1 | 1 | 1 | 1 |
|  |  | TTTATA | 2 | 2 | 2 | 2 |
|  |  | TTTCAA | 1 | 1 | 1 | 1 |
|  |  | TTTCAT | 1 | 1 | 1 | 1 |
|  |  | TTTCTG | 1 | 1 | 1 | 1 |
|  |  | TTTTAT | 1 | 1 | 1 | 1 |
|  |  | TTTTCC | 1 | 1 | 1 | 1 |
|  |  | TTTTCT | 1 | 1 | 1 | 1 |
|  |  | TTTTTA | 1 | 1 | 1 | 1 |
|  |  | TTTTTC | 1 | 1 | 1 | 1 |
|  |  | Total | 157 | 158 | 158 | 158 |
