# Supplementary material for: Comparative Chloroplast Genomics and Maternal Lineage Diversity in Oil Palm (Elaeis guineensis)
Source: Research Square preprint supplement (doi:10.21203/rs.3.rs-8662850/v1), 2026-02-23
Supplement: Supplementary file 2 [file 5b65ddc370e5bcf00fdbf2db.docx]

Supplementary table 3. Distribution of SSR Type on Single copies and Inverted Repeats of Plastomes Across four accessions.

|  | **Dura-Tz** | **Pisifera-Tz** | **Dura-Cmr** | **Dura-BBG** |
| --- | --- | --- | --- | --- |
| **LSC** | | | |
| Mono | 217 | 217 | 217 | 218 |
| Di | 37 | 37 | 37 | 37 |
| Tri | 32 | 32 | 32 | 32 |
| Tetra | 58 | 58 | 58 | 58 |
| Penta | 86 | 86 | 86 | 86 |
| Hexa | 96 | 96 | 96 | 95 |
|  | **SSC** | | | |
| Mono | 57 | 58 | 57 | 57 |
| Di | 7 | 7 | 7 | 7 |
| Tri | 13 | 13 | 13 | 13 |
| Tetra | 16 | 16 | 16 | 16 |
| Penta | 12 | 12 | 12 | 12 |
| Hexa | 18 | 18 | 18 | 18 |
|  | **IRa** | | | |
| Mono | 32 | 32 | 32 | 32 |
| Di | 7 | 7 | 7 | 7 |
| Tri | 15 | 15 | 15 | 15 |
| Tetra | 11 | 11 | 11 | 11 |
| Penta | 18 | 18 | 18 | 18 |
| Hexa | 22 | 22 | 22 | 22 |
|  | **IRb** | | | |
| Mono | 32 | 32 | 32 | 32 |
| Di | 7 | 7 | 7 | 7 |
| Tri | 15 | 15 | 15 | 15 |
| Tetra | 11 | 11 | 11 | 11 |
| Penta | 18 | 18 | 18 | 18 |
| Hexa | 22 | 22 | 22 | 22 |
