# Supplementary material for: Comparative Chloroplast Genomics and Maternal Lineage Diversity in Oil Palm (Elaeis guineensis)
Source: Research Square preprint supplement (doi:10.21203/rs.3.rs-8662850/v1), 2026-02-23
Supplement: Supplementary file 3 [file de6b8a431048ae846f2e655e.docx]

Supplementary Table S1. Classification of the *Elaeis guineensis* genes after annotation of the chloroplast genomes

| Groups of Genes | Genes |
| --- | --- |
| **Protein genes** |  |
| ATP synthase | *atpA,atpB,atpE,atpF,atpH,atpI.* |
| Cytochrome b/f complex | *petA,petB,petD,petG,petL,petN.* |
| RubisCO large subunit | *rbcL* |
| NADH dehydrogenase | *ndhA,ndhB,ndhC,ndhD,ndhE,ndhF,ndhG,ndhH,ndhI,ndhJ,ndhK* |
| Photosystem I | *psaA,psaB,psaC,psaI,psaJ* |
| Photosystem II | *psbA,psbB,psbC,psbD* *psbE, psbF, psbG, psbH, psbI, psbM, psbT, psbZ* |
| Hypothetical chloroplast reading frame | *Ycf1, ycf2* |
| **Ribosomal proteins** |  |
| Large subunits | *rpl2, rpl14, rpl16, rpl20, rpl22, rpl23, rpl32, rpl33, rpl36* |
| Small subunits | *rps2, rps3, rps4, rps7, rps8, rps11, rps12, rps14, rps15, rps16, rps18, rps19* |
| RNA polymerase | *rpoA, rpoB, rpoC1, rpoC2* |
| Acetyl-CoA carboxylase | *accD* |
| Inner envelope membrane | *cemA* |
| Cytochrome c biogenesis | *ccsA* |
| **Protein** |  |
| Protease | *clP1* |
| Maturase | *matK* |
| **RNAs Genes** |  |
| ribosomal RNAs | *rrn4.5, rrn5, rrn16, rrn23* |
| transfer RNAs | *trnA-UGC, trnC-GCA, trnD-GUC,trnE-UUC,trnF-GAA,trnG-GCC,trnG-UCC,trnH-GUG,trnI-GAU | trnE-UUC,trnI-GAU,trnK-UUU,trnL-CAA,trnL-UAA,trnL-UAG,trnM-CAU | trnfM-CAU,trnM-CAU| trnI-CAU,trnM-CAU,trnN-GUU,trnP-UGG,trnQ-UUG,trnR-ACG,trnR-UCU gene,trnS-CGA,trnS-GCU,trnS-GGA,trnS-UGA,trnT-GGU,trnT-UGU,trnV-GAC,*  *trnV-UAC | trnC-ACA,trnW-CCA,trnY-GUA* |
