# Supplementary material for: Comparative Chloroplast Genomics and Maternal Lineage Diversity in Oil Palm (Elaeis guineensis)
Source: Research Square preprint supplement (doi:10.21203/rs.3.rs-8662850/v1), 2026-02-23
Supplement: Supplementary file 4 [file e9fc45e252438e05004b3a31.docx]

Supplementary Table S4 Distribution and frequency of plastome haplotypes identified among 48 *Elaeis guineensis* chloroplast genomes

| Haplotype | Accession name(s) | Frequency |
| --- | --- | --- |
| HAP1 | OR125056, OR125055, OR125054, OR125053, OR125052, OR125051, OR125050, OR125048, OR125046, OR125045, OR125044, OR125043, OR125041, OR125040, OR125038, OR125035, OR125034, OR125033, cp-DURA, OR125042, OR125036, OR125039, OR125047, OR125037, cp-PISIFERA, cp-DKM, cp-BBG, OR125032, ON248756 | 29 |
| HAP2 | D-47-195, D-8317-98, D-1-01128-179, D-5764-34 | 4 |
| HAP3 | D-13267-6, D-26-84, D-10067-113 | 3 |
| HAP4 | T-157-30, CP-1-168 | 2 |
| HAP5 | CP-1-169 | 1 |
| HAP6 | D-157-17 | 1 |
| HAP7 | CP-1-65 | 1 |
| HAP8 | D-8376-234 | 1 |
| HAP9 | CP-1-101 | 1 |
| HAP10 | D-67-228 | 1 |
| HAP11 | D-83767-398 | 1 |
| HAP12 | D-20167-29 | 1 |
| HAP13 | D-201836-23 | 1 |
| HAP14 | D-4767-122 | 1 |
| Total |  | 48 |

Note: Accession names include GenBank accessions and internally designated plastome identifiers (Dura-Tz, Pisifera-Tz, Dura-Cmr, and Dura-BBG).
